# Supplementary material for: The importance of sulfur host structural preservation for lithium–sulfur battery performance
Source: Royal Society of Chemistry journal article supplement (doi:10.1039/d0ta08690h), 2020-01-01
Supplement: d0ta08690h1.pdf [file d0ta08690h1.pdf]

## **The Importance of Sulfur Host Structural Preservation for Lithium–Sulfur Battery Performance**

David McNulty\*, Victor Landgraf, and Sigita Trabesinger\*

Battery Electrodes and Cells, Electrochemistry Laboratory, Paul Scherrer Institute,  
Forschungsstrasse 111, 5232 Villigen PSI, Switzerland

\*Email: [sigita.trabesinger@psi.ch](mailto:sigita.trabesinger@psi.ch); Phone: +41 56 310 57 75

[david.mcnulty@psi.ch](mailto:david.mcnulty@psi.ch); Phone: +41 56 310 21 76

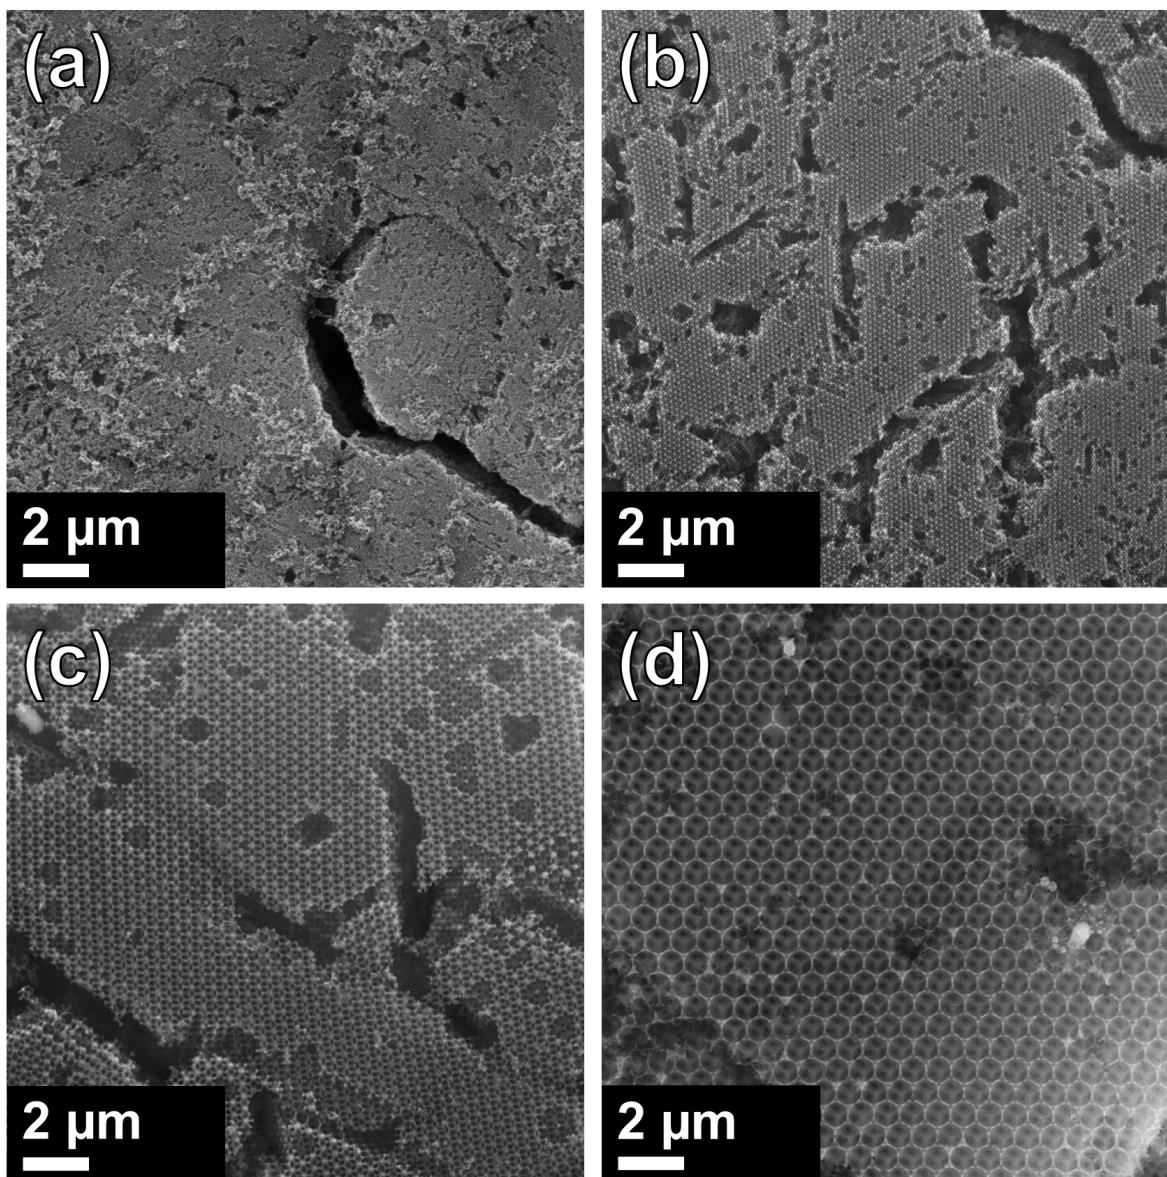

**Fig. S1.** Low magnification SEM images of (a) CIO-100, (b) CIO-200, (c) CIO-500 and (d) CIO-1000

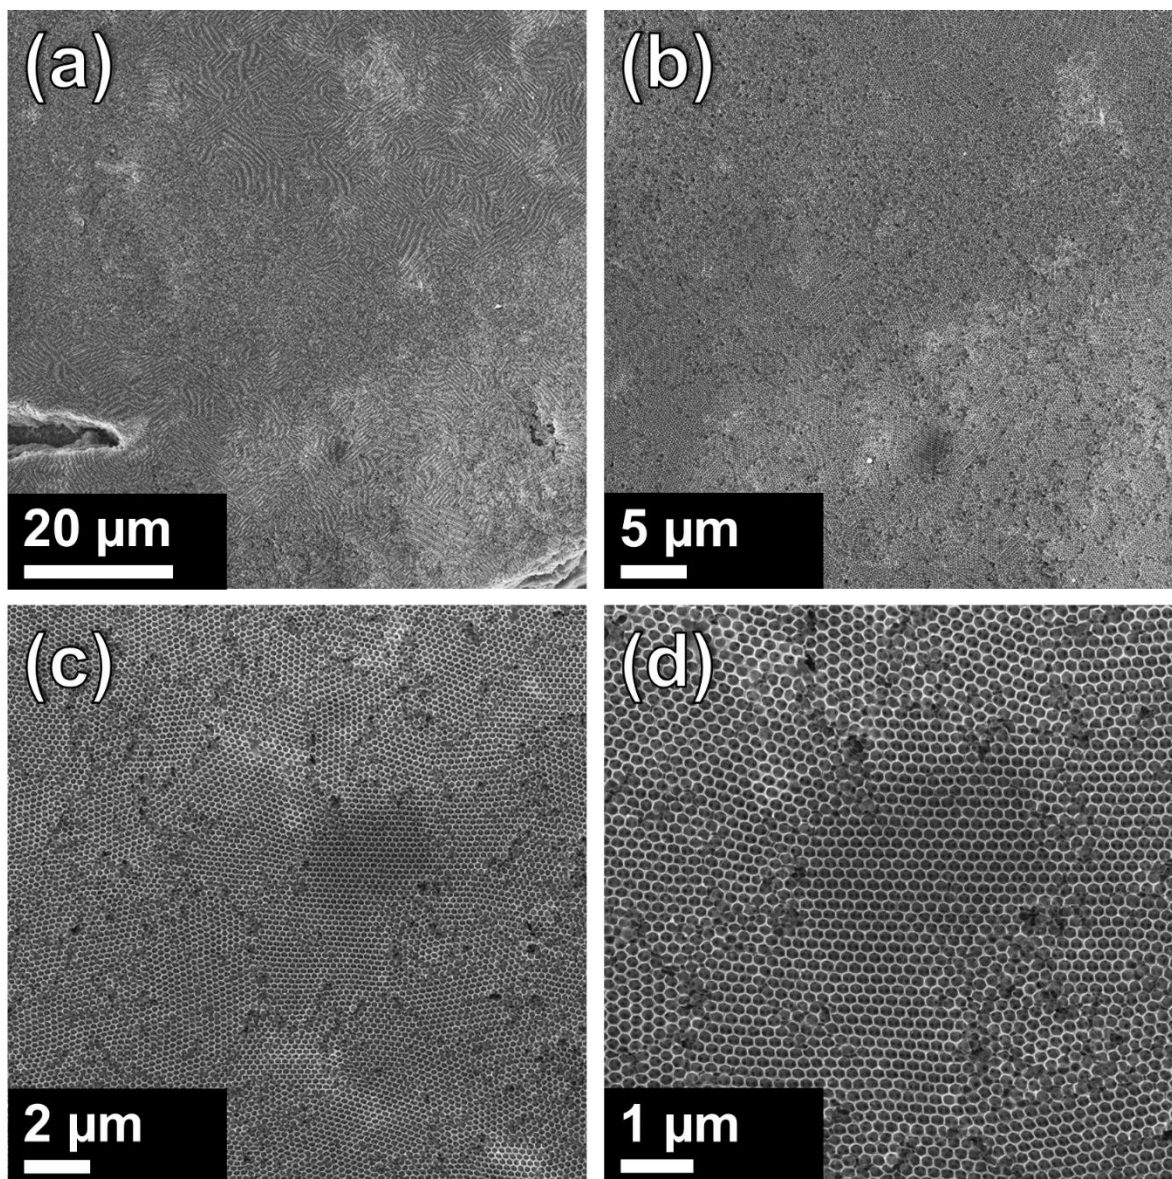

**Fig. S2.** Low magnification SEM images of an S-infilled CIO-200 sample

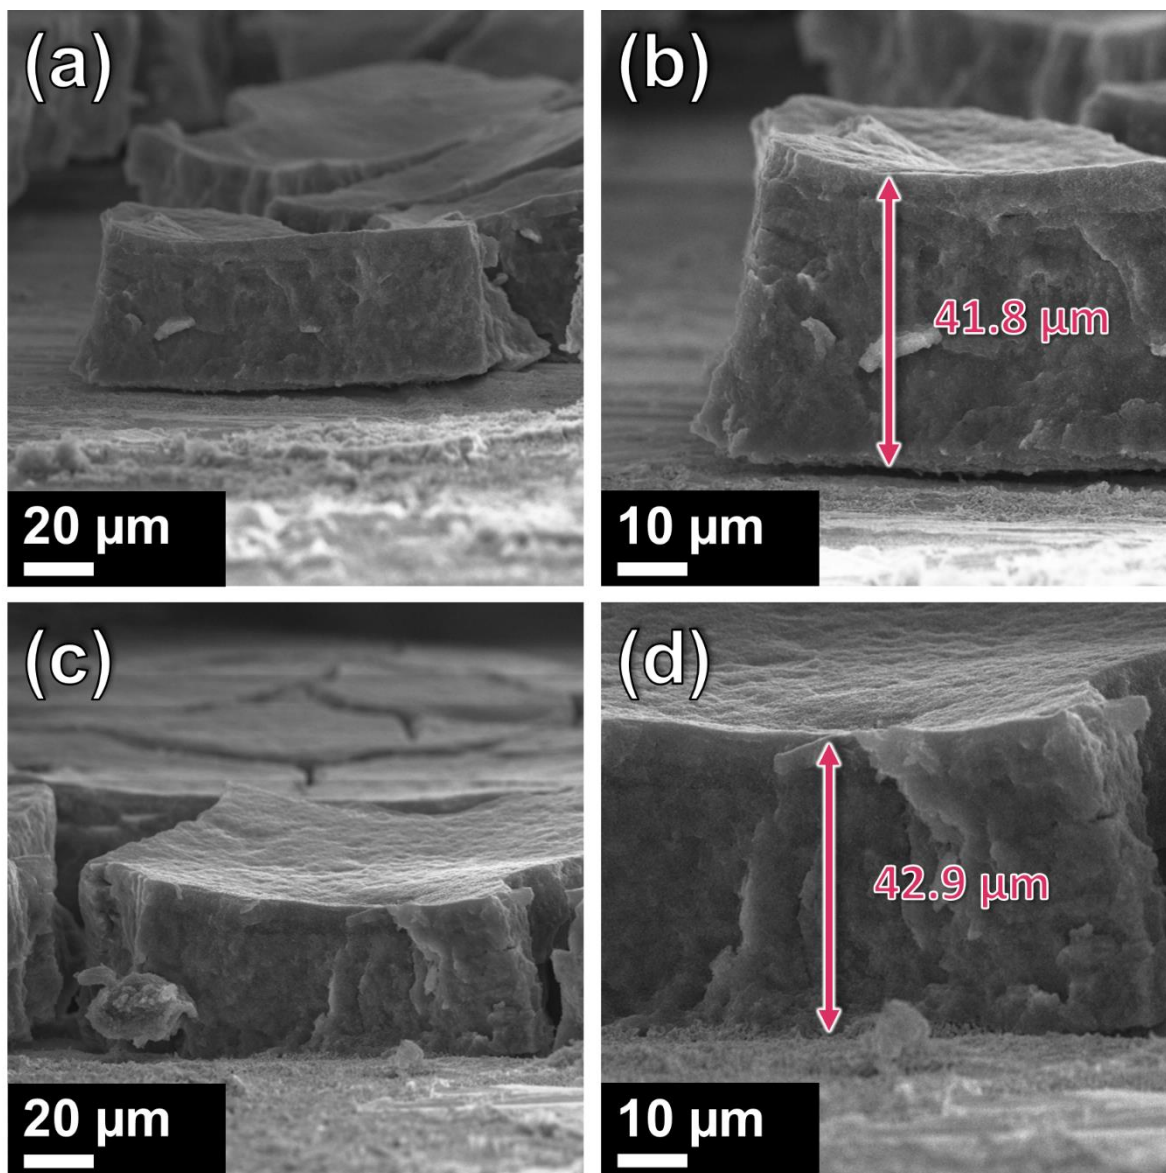

**Fig. S3.** Tilted SEM images of a fractured S-infilled CIO-200 sample, demonstrating the thickness of the IO material. (Tilt angle: 90°)

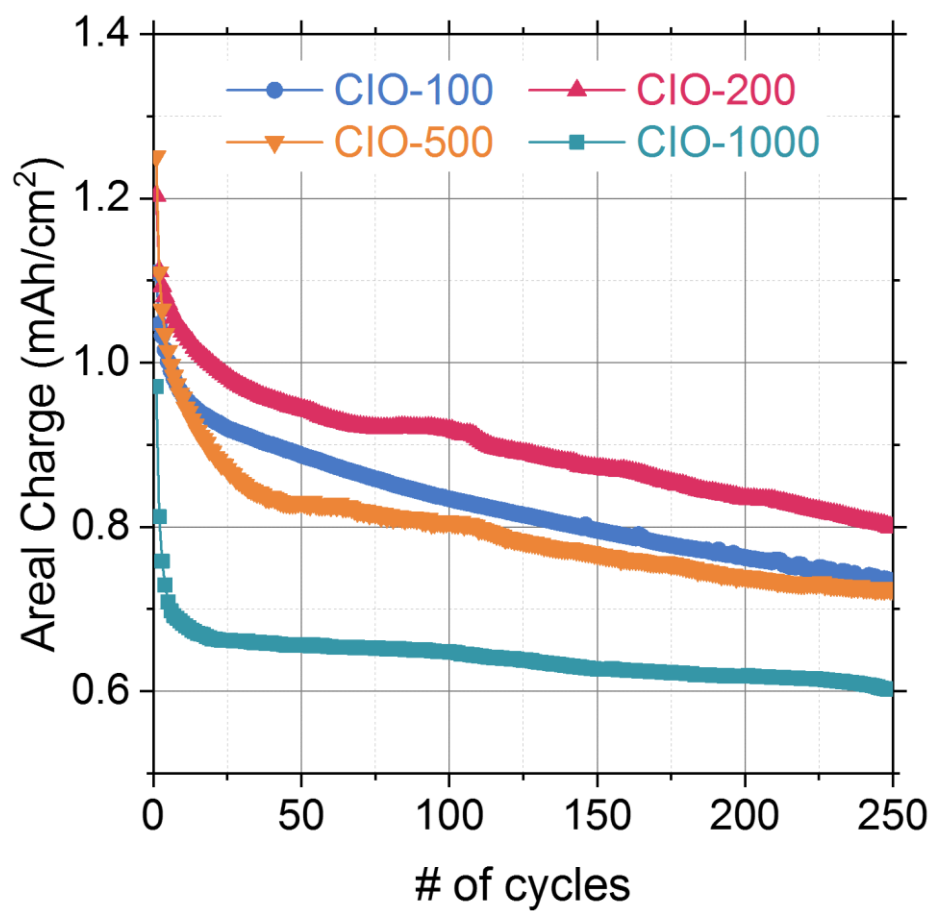

**Fig. S4.** Areal charge values for sulfur infilled CIO-100, CIO-200, CIO-500 and CIO-1000 over 250 cycles. All samples were cycled in a potential window of 2.7 – 1.8 V (vs Li/Li<sup>+</sup>) at 0.2 C.

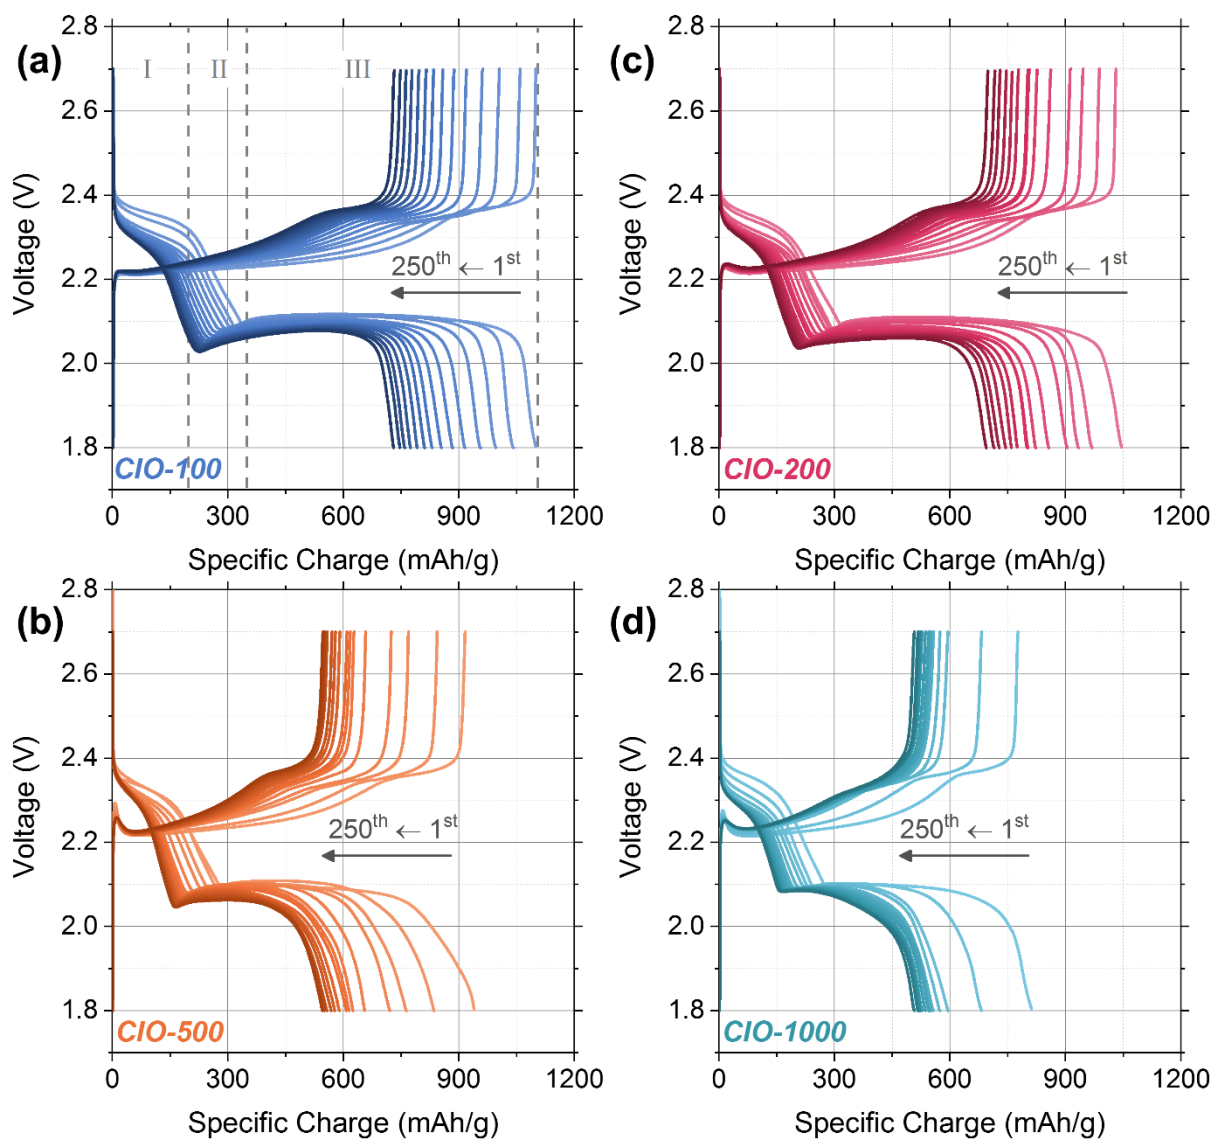

**Fig. S5.** A range of galvanostatic discharge and charge curves for (a) CIO-100, (b) CIO-200, (c) CIO-500 and (d) CIO-1000. All samples were cycled at a rate of 0.2 C. The cycles shown are for the 1<sup>st</sup>, 2<sup>nd</sup>, 5<sup>th</sup>, 10<sup>th</sup> and 25<sup>th</sup> cycles and then every 25<sup>th</sup> cycle from the 25<sup>th</sup> to the 250<sup>th</sup> cycle.

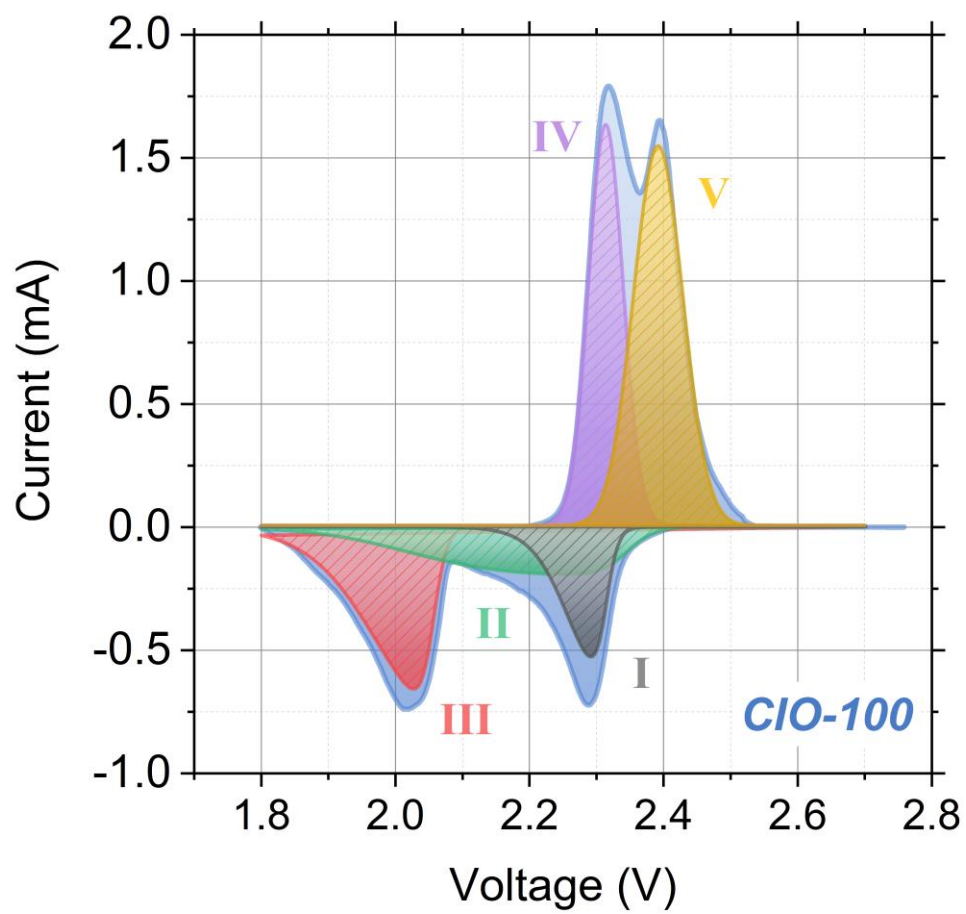

**Fig. S6:** Deconvoluted cyclic voltammogram for an S-infilled CIO-100 sample

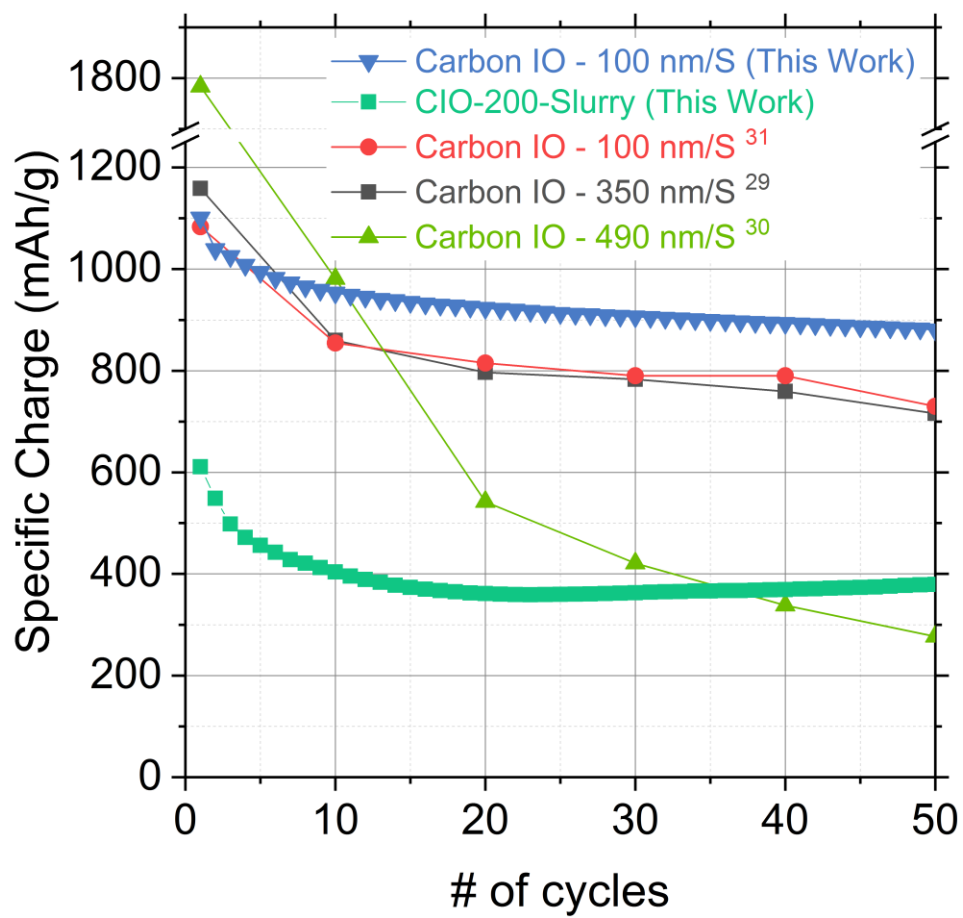

**Fig. S7.** Comparison of specific charge values obtained for an S-infilled carbon IO and a carbon IO slurry in this study with previously reported values for other carbon IO S-hosts. <sup>1-3</sup>

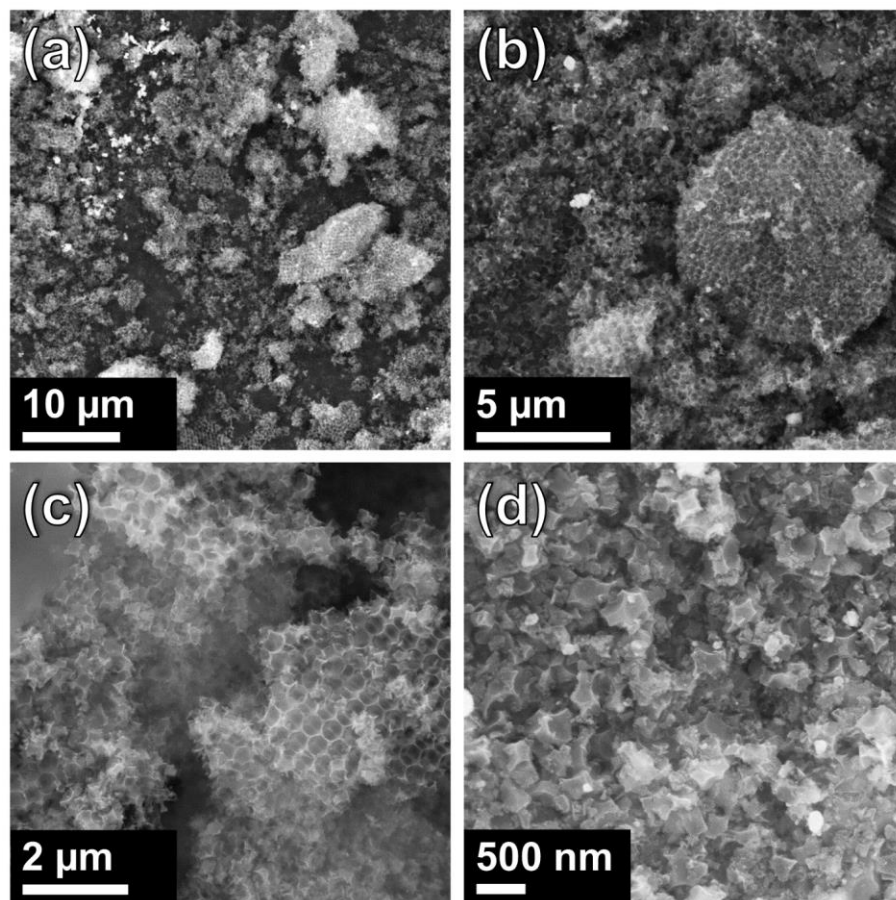

**Fig. S8.** SEM images of a carbon IO prepared with 500 nm diameter PSS after being removed from a stainless steel substrate and being ground in a mortar and pestle.

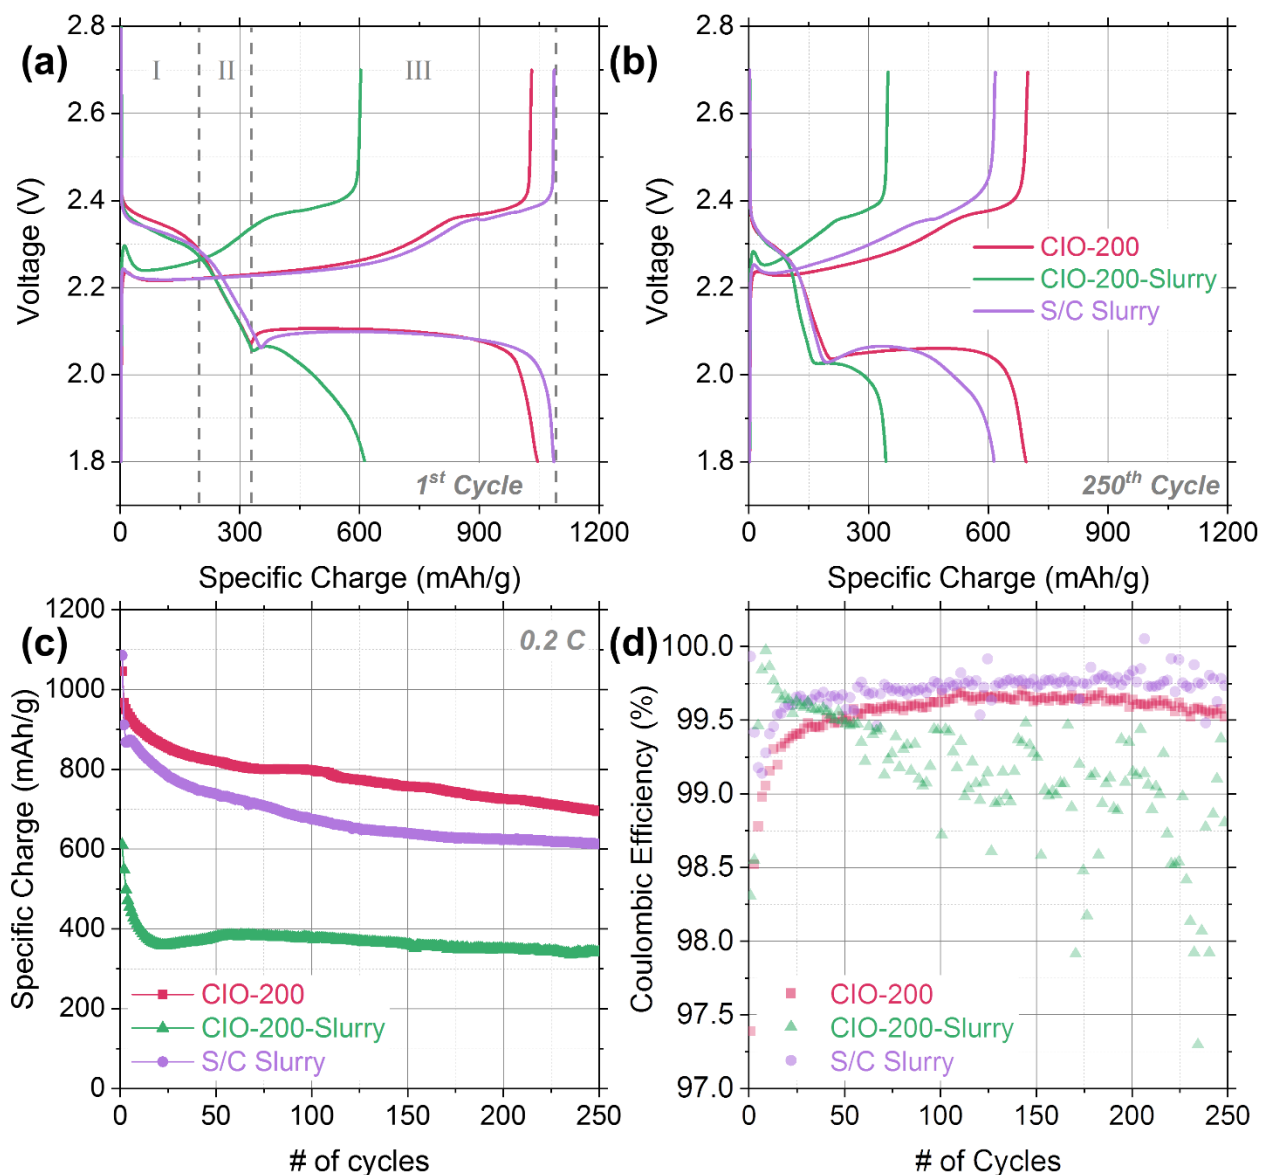

**Fig. S9.** A comparison of voltage profiles obtained for (a) the 1<sup>st</sup> and (b) the 250<sup>th</sup> cycles for a CIO-200-Slurry electrode, a binder/conductive additive free CIO-200 sample and a conventional C/S slurry. Comparison of (c) the specific capacity retention and (d) the Coulombic efficiency over 250 cycles. All samples were cycled in a potential window of 2.7 – 1.8 V (vs Li<sup>+</sup>/Li) at 0.2 C.

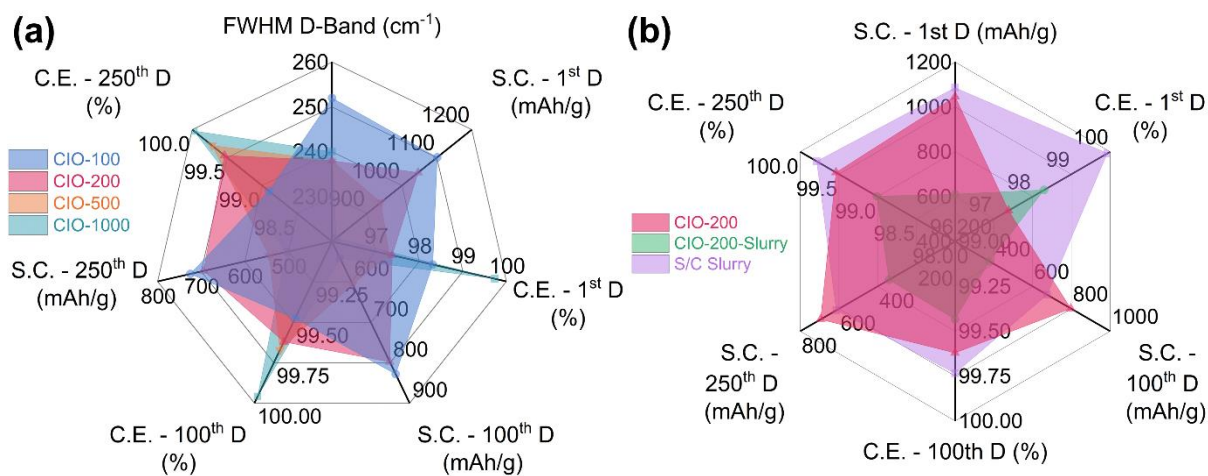

**Fig. S10.** (a) Radar plot comparing the FWHM of the D-band, from analysis of Raman spectroscopy, specific charge and Coulombic efficiency values for sulfur infilled CIO-100, CIO-200, CIO-500 and CIO-1000. (b) Radar plot comparing the electrochemical performance of CIO-200, CIO-200-Slurry and a conventional S/C composite slurry. Legend: S.C. = specific capacity, C. E. = Coulombic efficiency, D = Discharge.

## References

1. N. Tachikawa, K. Yamauchi, E. Takashima, J.-W. Park, K. Dokko and M. Watanabe, *Chem. Commun.*, 2011, **47**, 8157-8159.
2. M. Agrawal, S. Choudhury, K. Gruber, F. Simon, D. Fischer, V. Albrecht, M. Göbel, S. Koller, M. Stamm and L. Ionov, *J. Power Sources*, 2014, **261**, 363-370.
3. B. Ding, C. Yuan, L. Shen, G. Xu, P. Nie and X. Zhang, *Chem. Eur. J.*, 2013, **19**, 1013-1019.
